# Supplementary material
Source: PubMed Central journal article supplement (PMC5805585)

## **mTORC2/AKT/HSF1/HuR constitute a feed-forward loop regulating Rictor expression and tumor growth in glioblastoma**

**Holmes *et al.***

### **Supplementary Information**

#### Supplemental figure legends

**Figure S1.** **A).** Expression levels of phospho-S<sup>473</sup>-AKT, phospho-S<sup>326</sup>-HSF1, HuR and Rictor from Figure 3A. Quantification of band intensities was determined by densitometry. **B).** mSin1 knockdown blocks EGF-induced AKT/HSF1/HuR/Rictor signaling. U138 cells stably expressing either a scr-crtl (scrambled sequence negative control) or mSin1-shRNA targeting construct, were treated with EGF (100 µg/ml, 8 h) and expression levels of the indicated proteins determined by immunoblotting.

**Figure S2.** Quantification of expression levels of phospho-S<sup>473</sup>-AKT, total-AKT, phospho-S<sup>326</sup>-HSF1, total-HSF1, HuR and Rictor from Figure 4A.

**Figure S3.** Polysome distribution of Rictor and actin mRNAs from U138 cells transduced with empty vector or constitutively active HSF1 (HSF1-CA) and treated with siRNAs targeting AKT as indicated. Performed as in figure 1D. Mean and +S.D. are shown. \*;  $P < 0.05$ .

**Figure S4.** Graphic representations of correlations between the expression levels of the indicated proteins in 34 tumor samples. Levels are expressed as arbitrary units of optical density following quantification. Spearman coefficient  $r_s$  values are indicated.

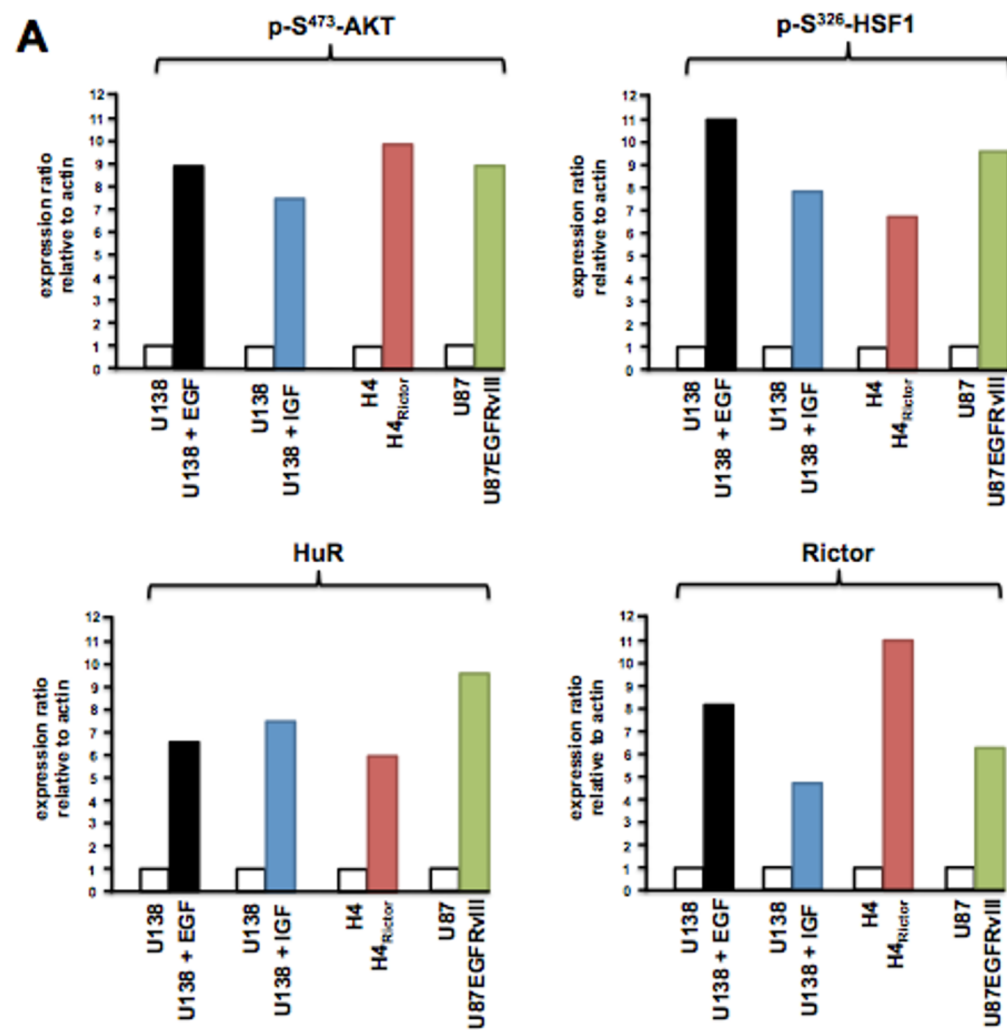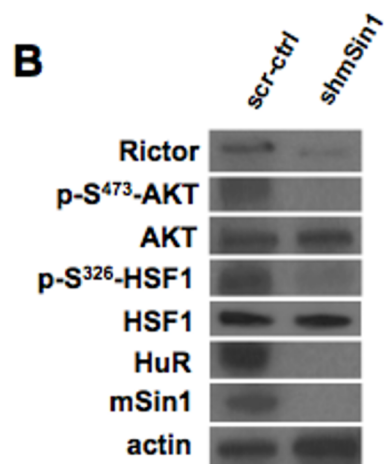

Holmes *et al.*, Supplemental Figure S2

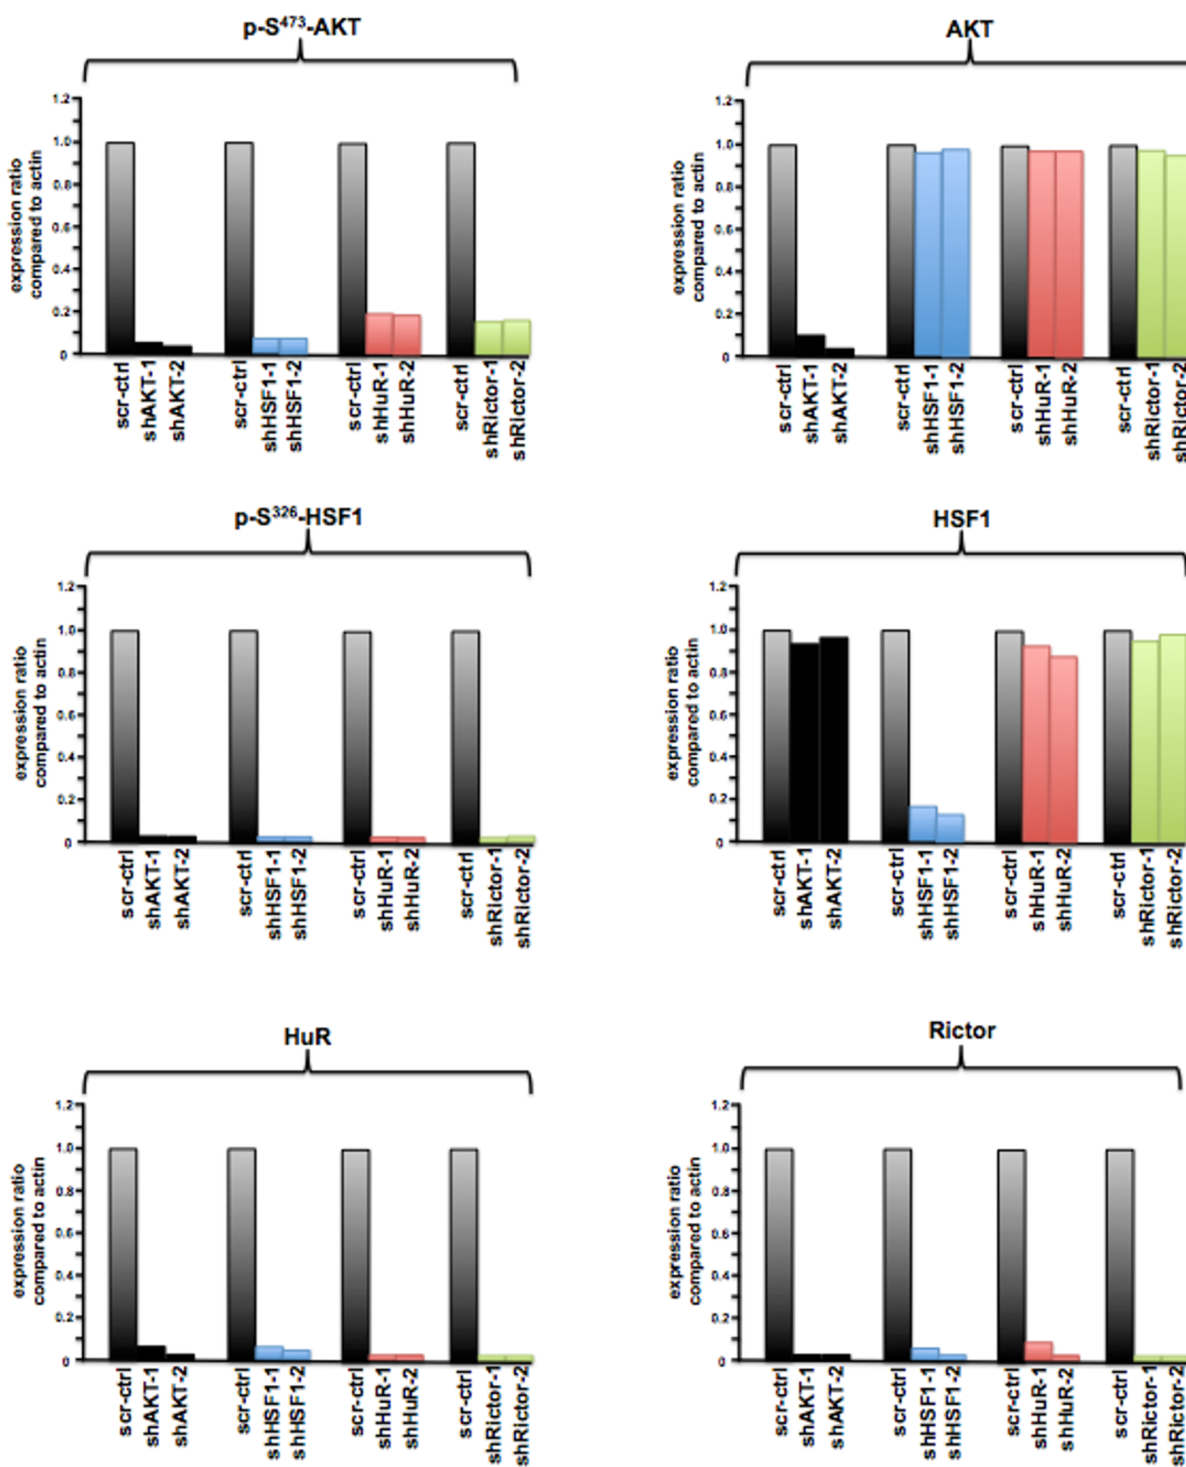

Holmes *et al.*, Supplemental Figure S3

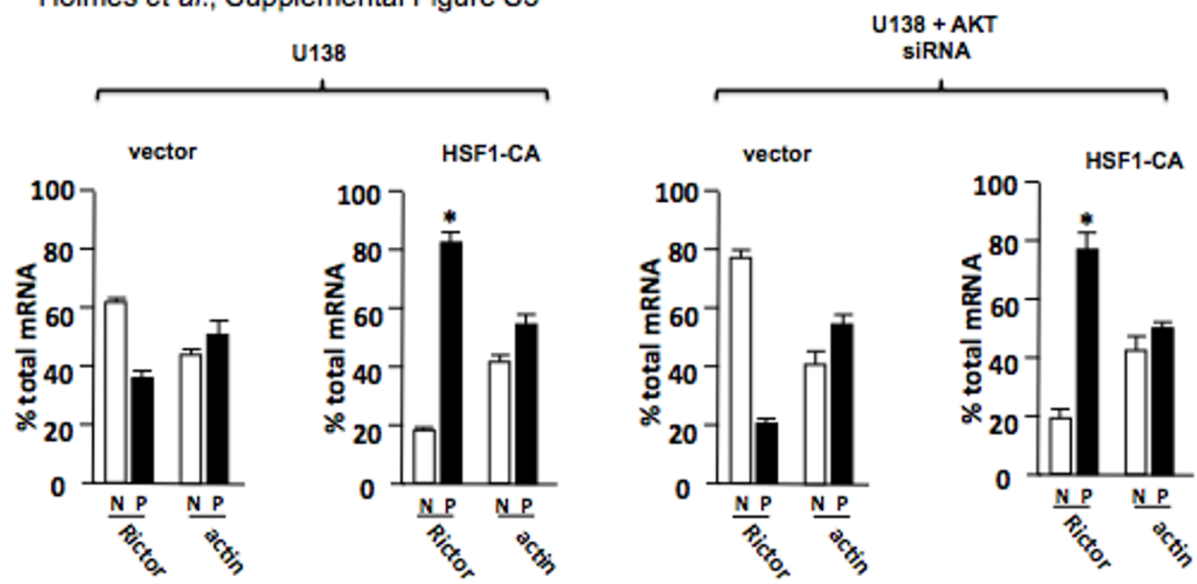

Holmes *et al.*, Supplemental Figure S4

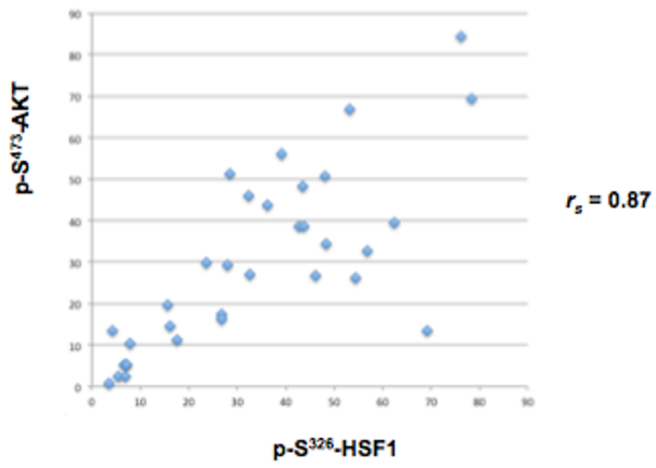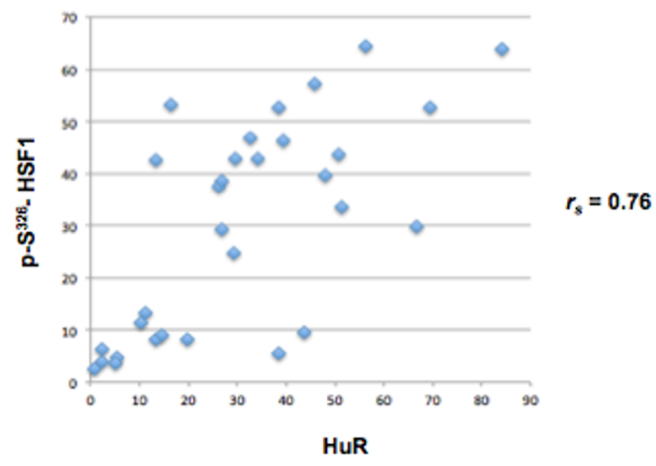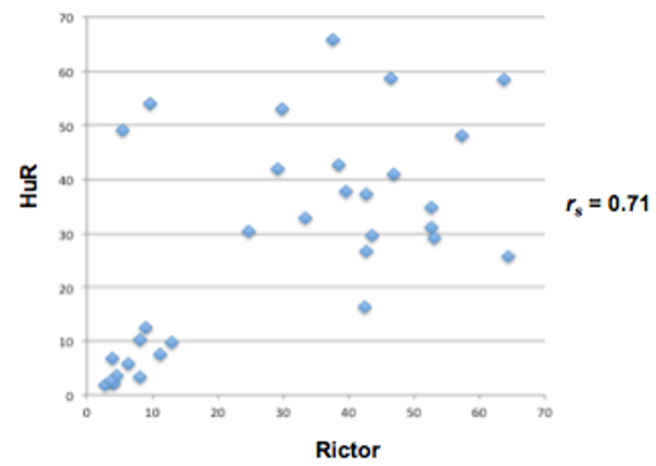

Supplement: NIHMS902937-supplement-1.pdf [file NIHMS902937-supplement-1.pdf]
